# Supplementary material
Source: Springer Nature journal article supplement (https://www.springermedizin.de/resource/supplementary/12889_2004_132_MOESM2_ESM.pdf/9500384)

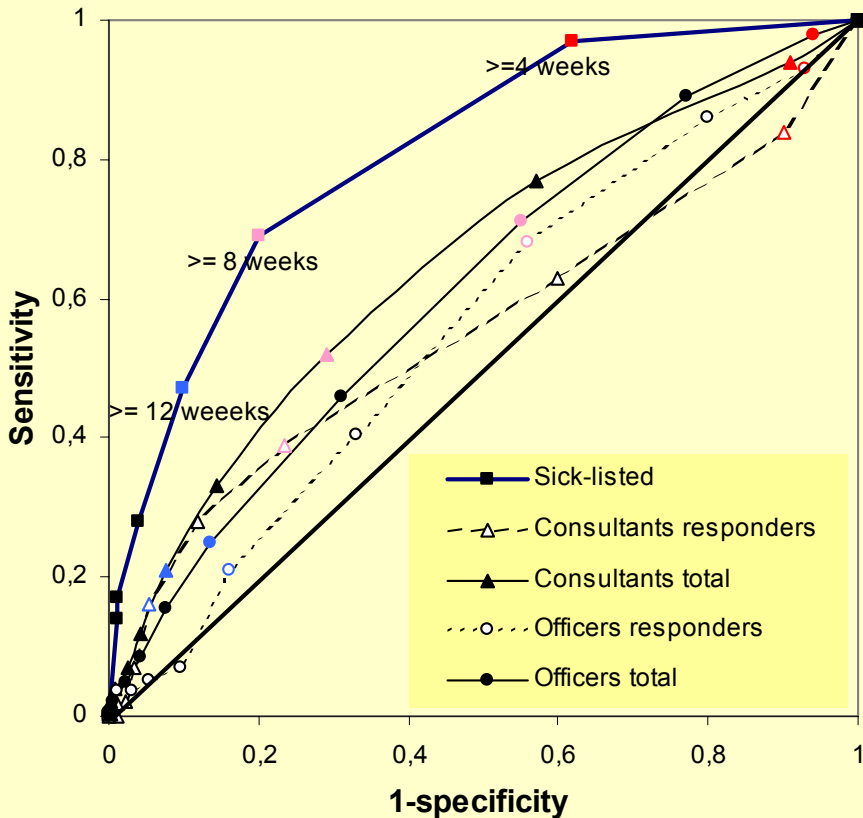

Supplement: MOESM2 [file 9500384]
